# Supplementary material for: Daily temporal dynamics of vaginal microbiota before, during and after episodes of bacterial vaginosis
Source: Springer Nature journal article supplement (doi:10.1186/2049-2618-1-29), 2013-12-01

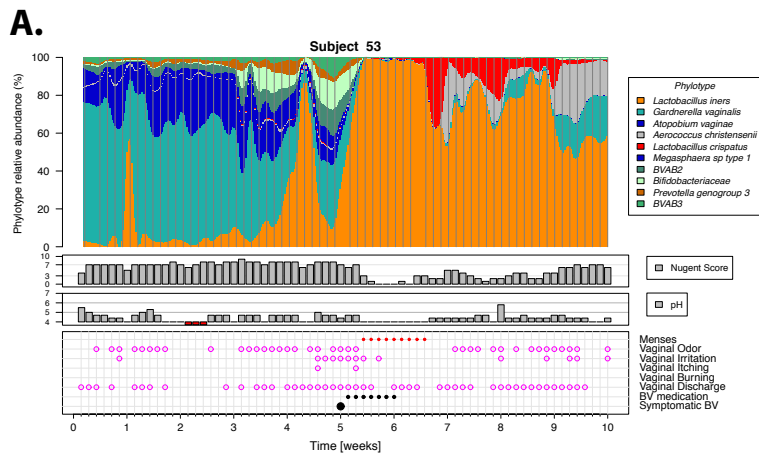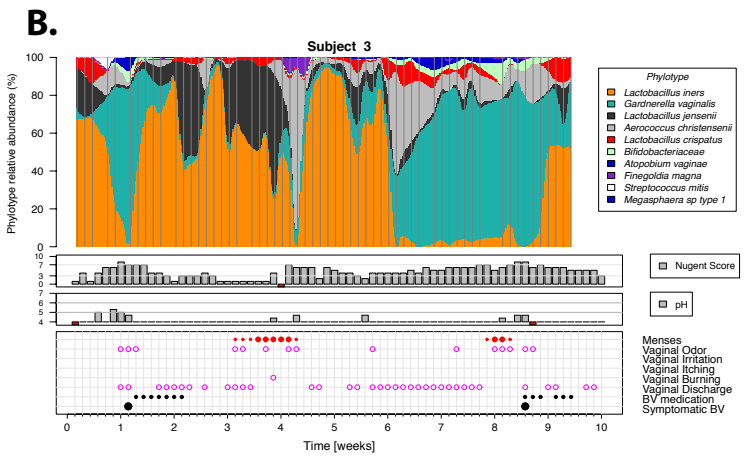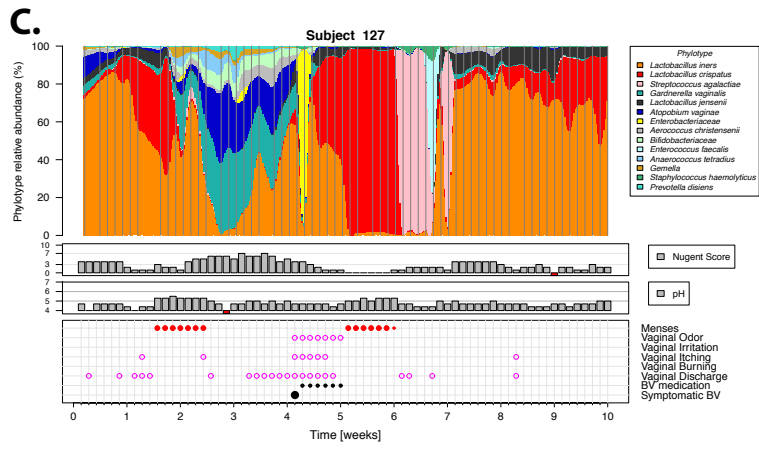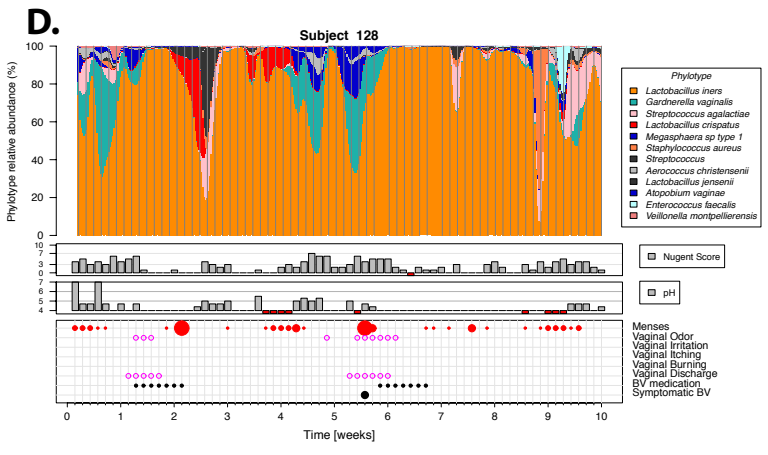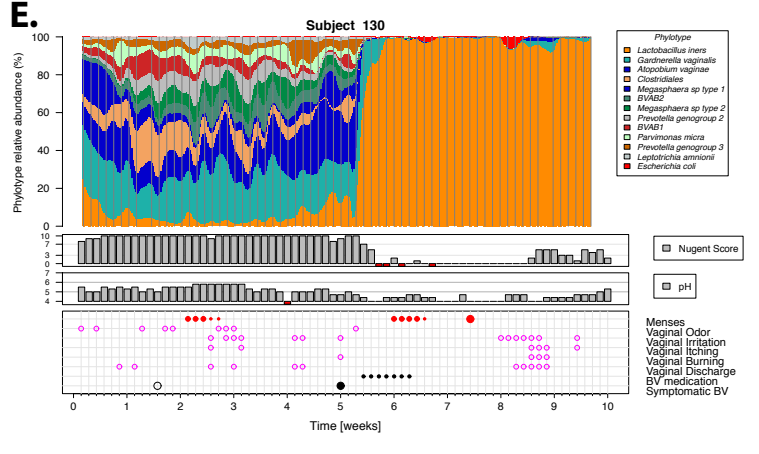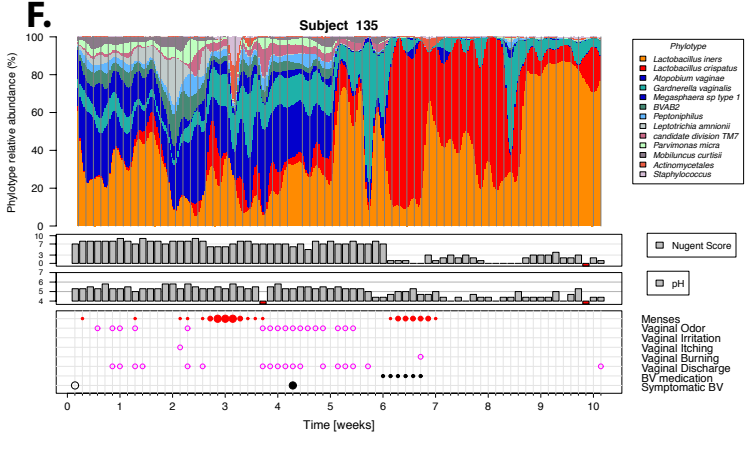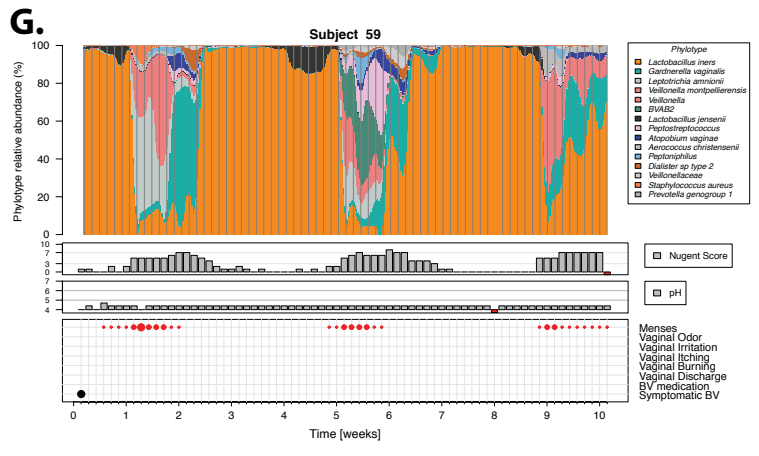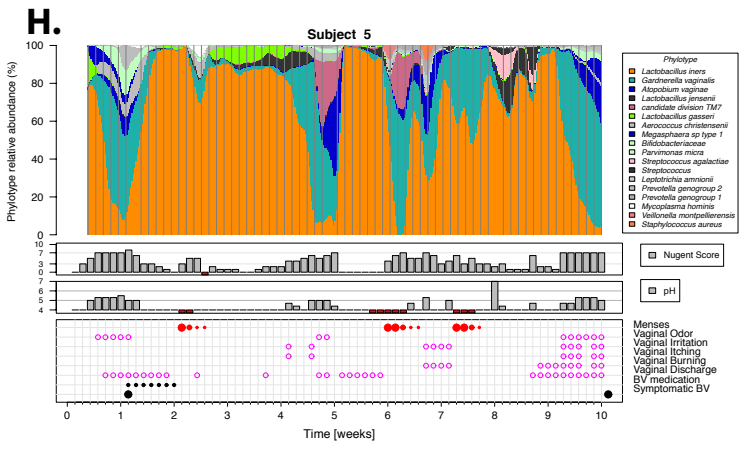

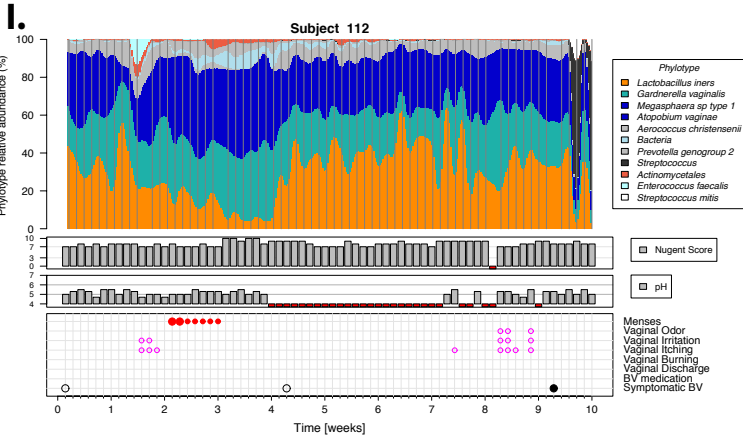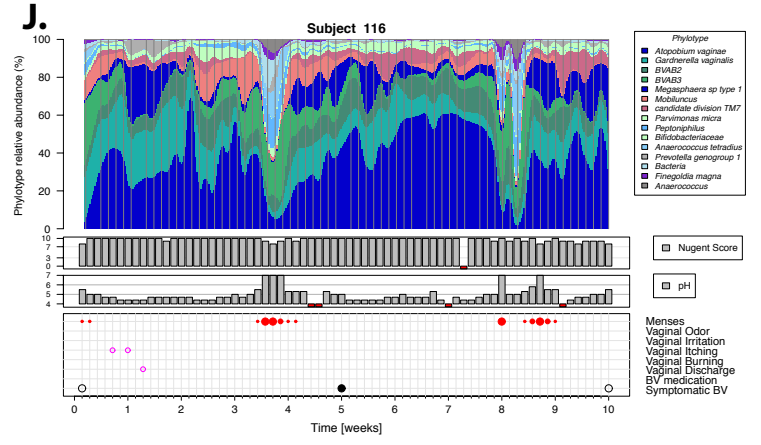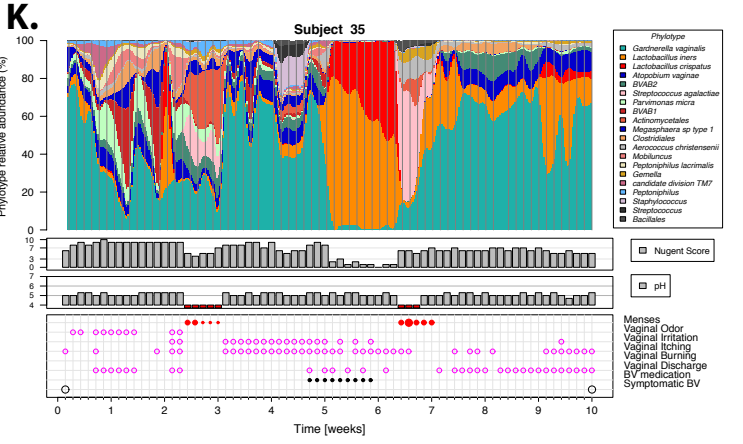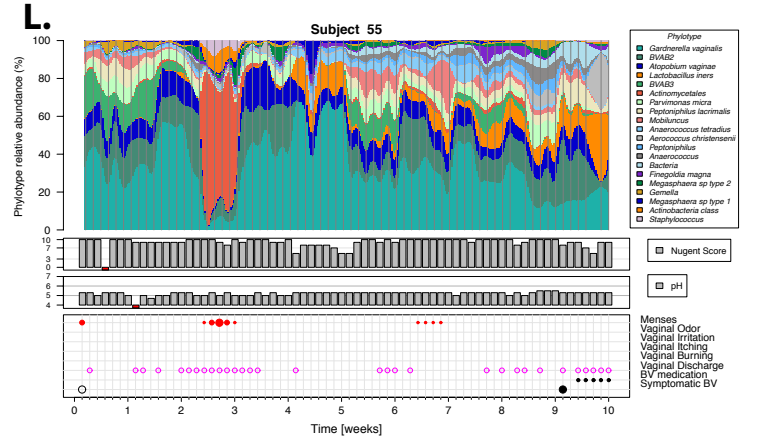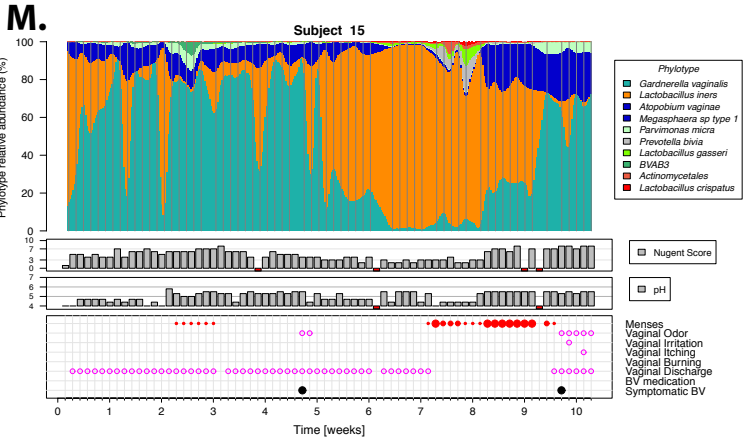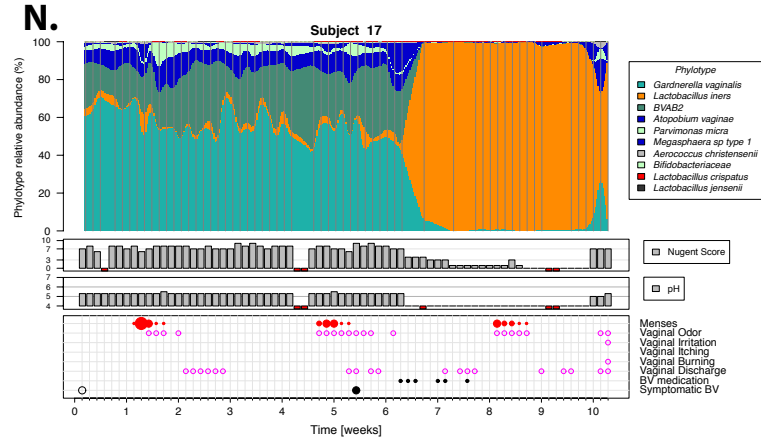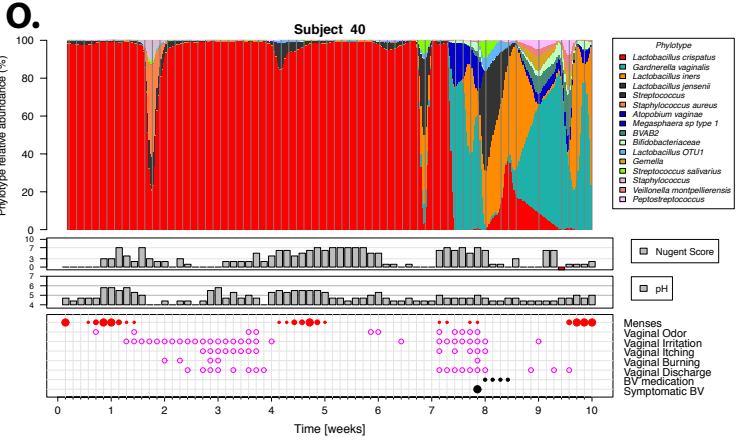

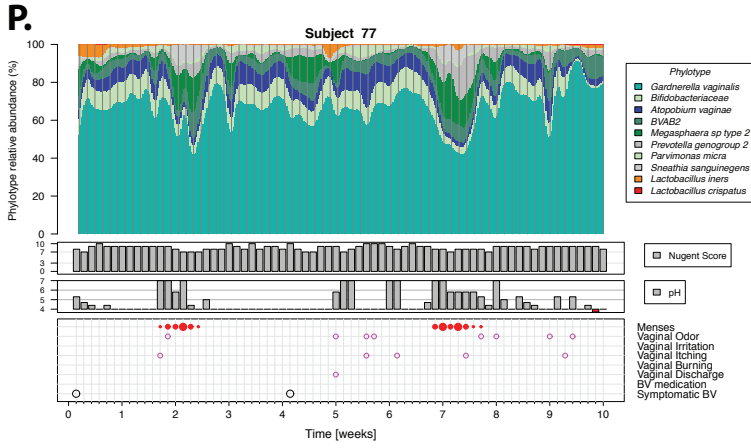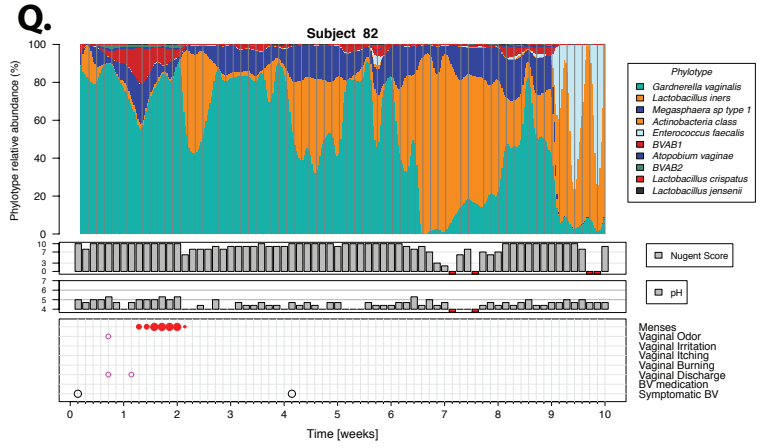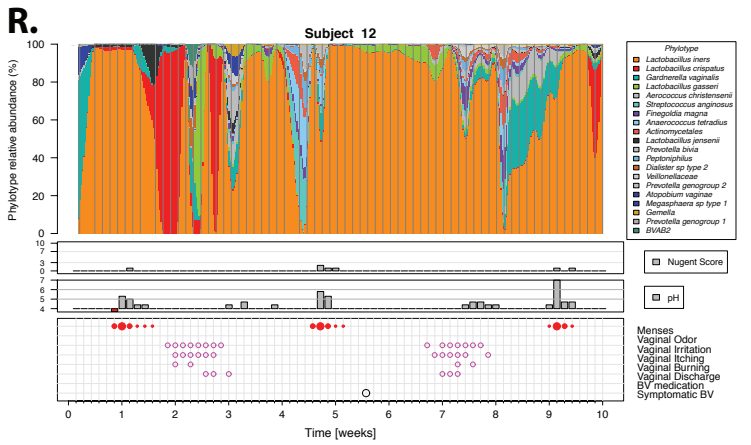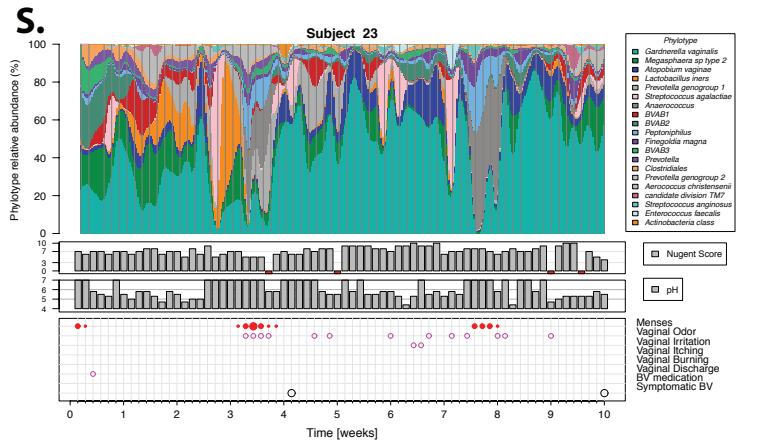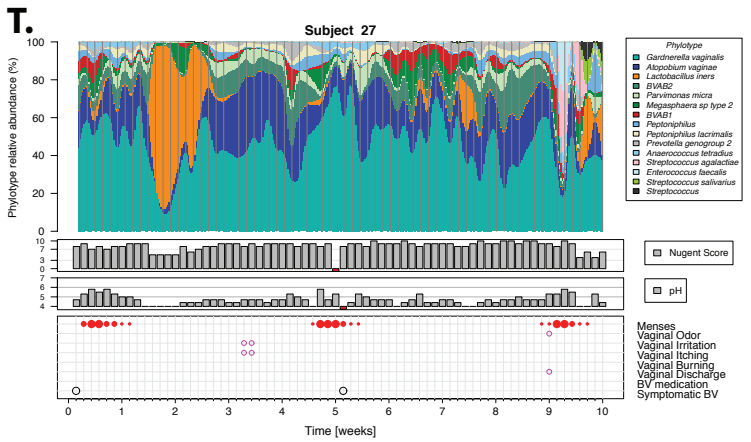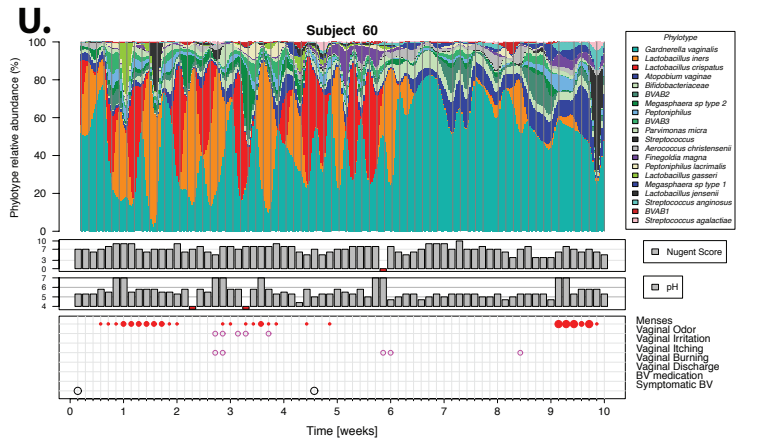

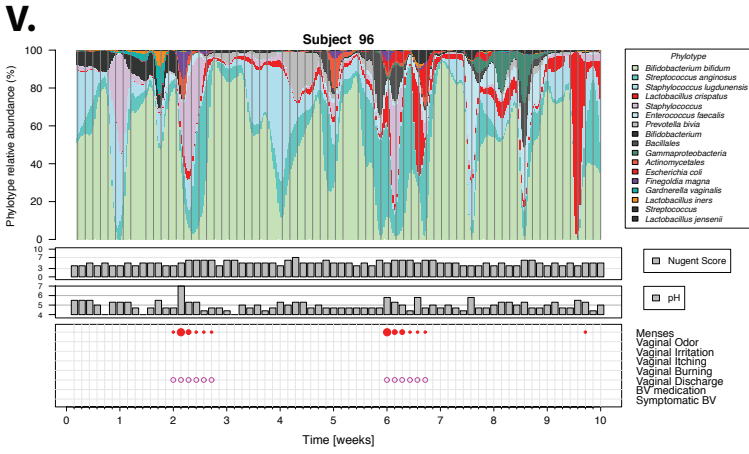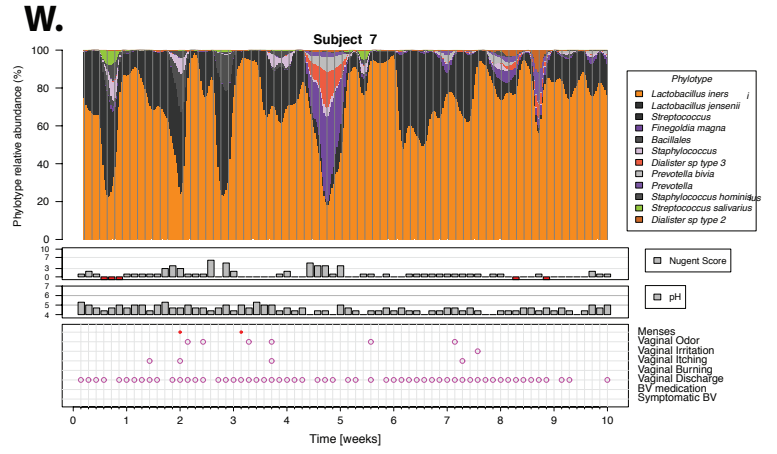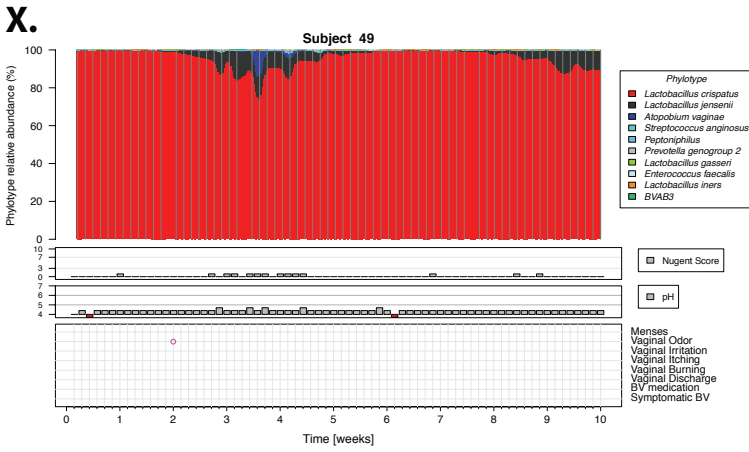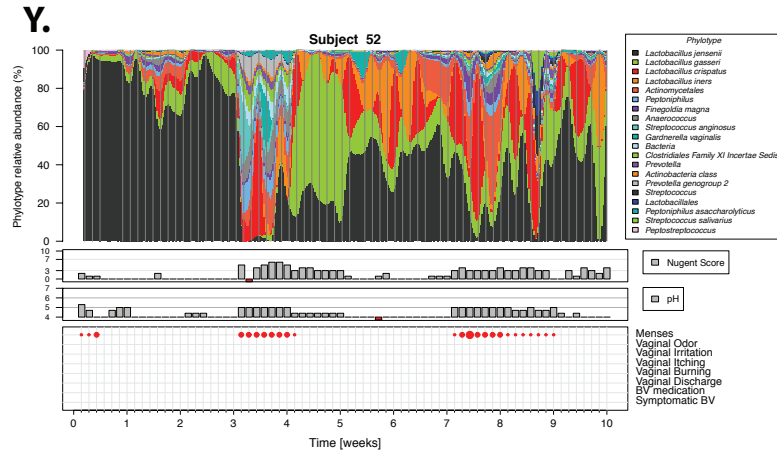

Supplement: 40168_2013_28_MOESM4_ESM.pdf [file 40168_2013_28_MOESM4_ESM.pdf]
